# Supplementary material
Source: MDPI journal article supplement (https://www.mdpi.com/2073-8994/13/8/1506)
Supplement: s1 [file s1]

**Table S1.** The performance of DP-PSSM with different  $\alpha$  on the D1\_Train dataset using the 10-fold CV.

| Method  | $\alpha$ | ACC   | SN    | SP    | MCC   |
|---------|----------|-------|-------|-------|-------|
| DP-PSSM | 1        | 0.827 | 0.657 | 0.909 | 0.593 |
|         | 2        | 0.834 | 0.657 | 0.918 | 0.607 |
|         | 3        | 0.824 | 0.667 | 0.899 | 0.587 |
|         | 4        | 0.844 | 0.677 | 0.923 | 0.631 |
|         | 5        | 0.814 | 0.707 | 0.865 | 0.574 |

**Table S2.** Prediction comparison on the D1\_Train and D2\_Train datasets by using the 10-fold CV and the jackknife CV.

| Dataset  | Validation   | ACC   | SN    | SP    | MCC   |
|----------|--------------|-------|-------|-------|-------|
| D1_Train | 10-fold CV   | 0.873 | 0.747 | 0.933 | 0.703 |
|          | Jackknife CV | 0.879 | 0.778 | 0.928 | 0.720 |
| D2_Train | 10-fold CV   | 0.864 | 0.852 | 0.876 | 0.728 |
|          | Jackknife CV | 0.868 | 0.868 | 0.868 | 0.736 |

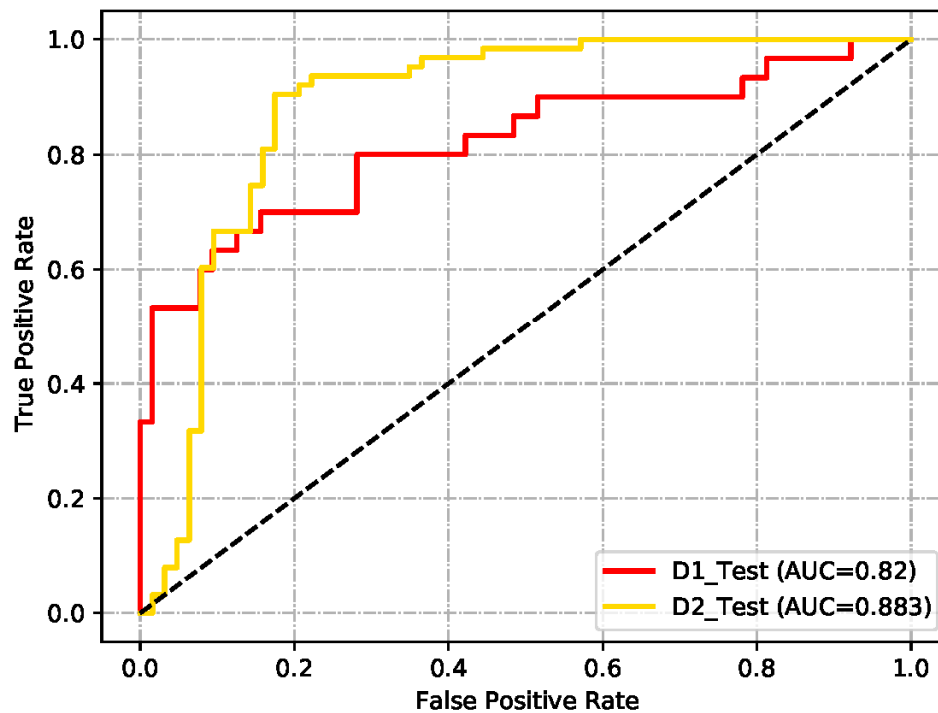

**Figure S1:** The ROC curves of iPVP-MCV on the independent testing datasets.
